# Supplementary material
Source: ML conference proceedings conference paper supplement (https://openreview.net/forum?id=JMweItBmbx)

### The problem in question:

Retrieve (symbolic) text from long, non-natural-language metadata using a natural-language specification.

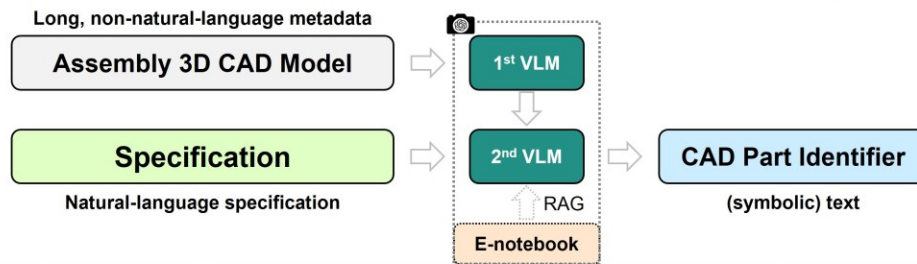

### Example:

#### Specification

The cylindrical protrusion on the vertical plate must align and securely fit into the curved channel of the rectangular housing.

#### Assembly 3D CAD Model (excerpt for illustration)

```
FILE_SCHEMA (('AUTOMOTIVE_DESIGN { 1 0 10303 214 3 1 1 }'));
ENDSEC;

DATA;
#10=MECHANICAL_DESIGN_GEOMETRIC_PRESENTATION_REPRESENTATION('',( #283,#284,#285,#
286,#287,#288,#289,#290,#291,#292,#293,#294,#295,#296,#297,#298,#299,#300,#301,#302,#303,#3
04,#305,#306,#307,#308,#309,#310,#311,#312,#313,#314,#315,#316),#10825);
#11=ITEM_DEFINED_TRANSFORMATION($,$,#6046,#6426);
#12=ITEM_DEFINED_TRANSFORMATION($,$,#6055,#6427);
...
#11053=COLOUR_RGB('Aluminum - Anodized Glossy (Grey)',0.537254901960784,
0.537254901960784,0.537254901960784);
...
ENDSEC;
END-ISO-10303-21;
```

#### Assembly

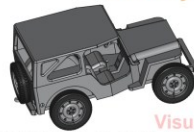

#### Parts

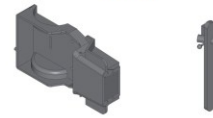

#### CAD part identifier

f806e224-05a9-11ec-b59d-  
0ac00e04190b;  
f80952b8-05a9-11ec-8cf4-  
0ac00e04190b

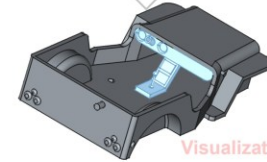

Supplement: supplementary_material [file 1_scope.pdf › Supplementary_Material/1_scope.pdf]
