# Supplementary material
Source: ML conference proceedings conference paper supplement (https://openreview.net/forum?id=JMweItBmbx)
Supplement: supplementary_material [file 2_CoT.pdf › Supplementary_Material/2_CoT.pdf]

(a) Reference formation

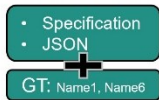

(b) Error Notebook Construction Process

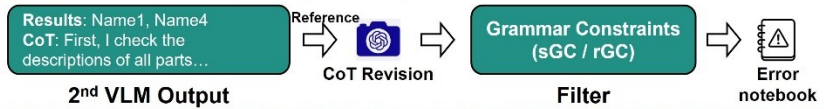

(c) CoT Revision

Original CoT up to first error (O) + Transition (T) + New reasoning path (N) + GT

**(O)** First, I check the descriptions of all parts. The specification states that the ... rectangular panel. **The second part, Name1, is described as a ...the panel to the ends of the arm.**

**(T)** But, wait, let's pause and examine this more carefully.

**(N)** The description mentions a flat panel "without holes." If the panel needs to be mounted securely with fasteners, the absence of holes could initially seem problematic. However, given this specific instruction, there may be another mounting method or the holes could be added later. Let's think about this logically. The second part, Name1, is described as a curved arm with an integrated rectangular block and flat face. Given this structure, it can....

**(GT)** Final answer: Name1, Name6.
