# Supplementary material
Source: ML conference proceedings conference paper supplement (https://openreview.net/forum?id=JMweItBmbx)

How to build?

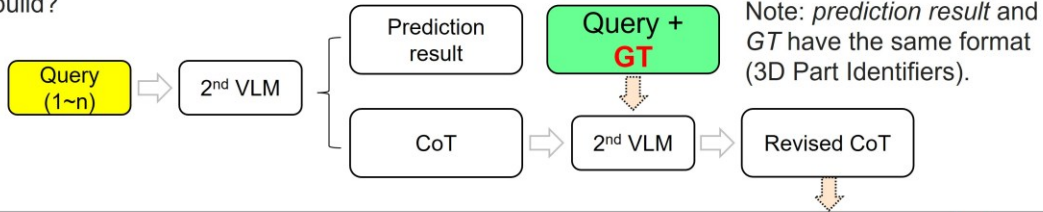

**Original CoT up to first error + Transition + New reasoning path + GT**

**(Original CoT up to first error)** First, I check the descriptions of all parts. The specification states that the ... rectangular panel. ~~The second part, 46dab76c-05b3-11ec-94cf-0621f375c677.png, is described as a ...the panel to the ends of the arm.~~

**(Transition)** But, wait, let's pause and examine this more carefully. **(New reasoning path)** The description mentions a flat panel "without holes." If the panel needs to be mounted securely with fasteners, the absence of holes could initially seem problematic. However, given this specific instruction, there may be another mounting method or the holes could be added later. Let's think about this logically. The second part, 46dab76c-05b3-11ec-94cf-0621f375c677.png, is described as a curved arm with an integrated rectangular block and flat face. Given this structure, it can.... My final answer is **(GT)** XXX.

**Filter: grammar constraints (GC)**

How to apply?

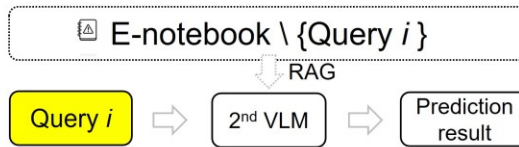

Supplement: supplementary_material [file 2_CoT_Updated.pdf › Rebuttal_Appendix/2_CoT_Updated.pdf]
